# Supplementary material
Source: PubMed Central journal article supplement (PMC7954779)
Supplement: mmc2.pdf [file mmc2.pdf]

# Supplementary figure 1

## A

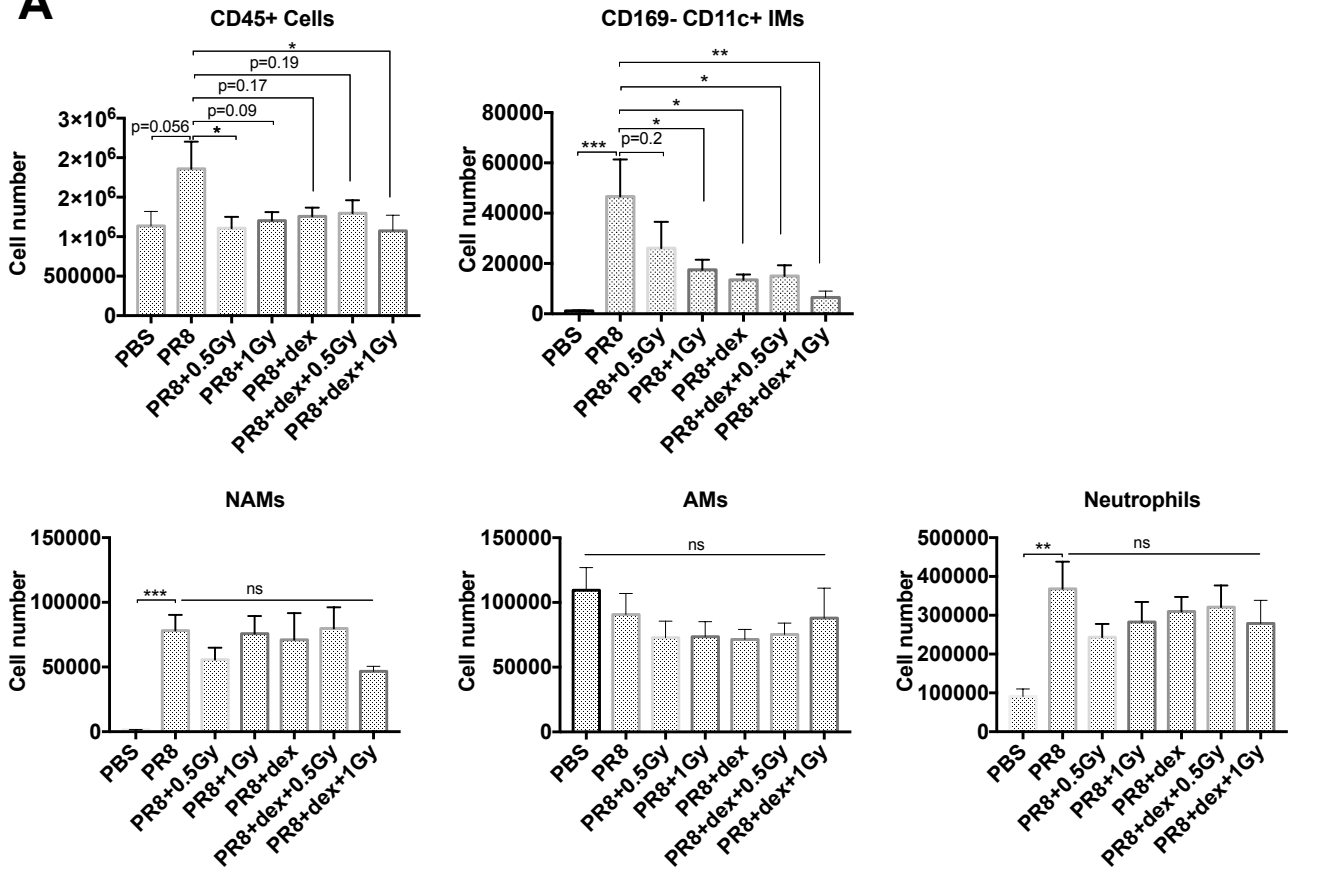

## B

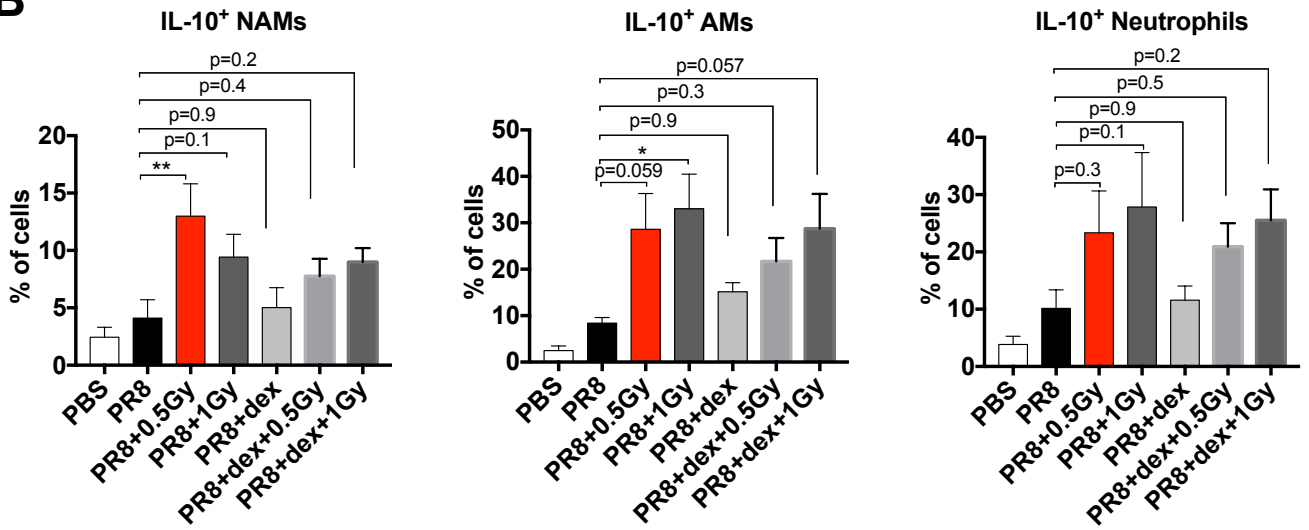

**Supplementary figure 2**

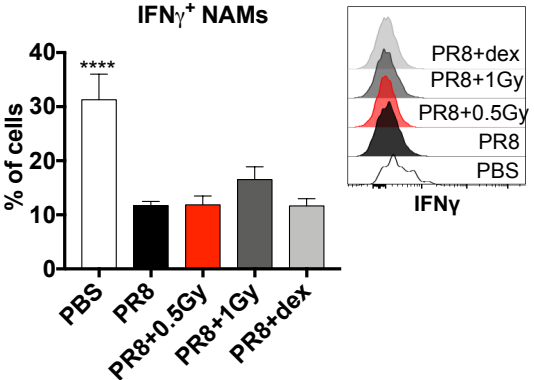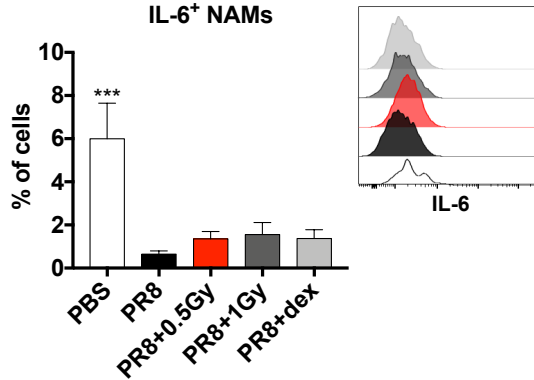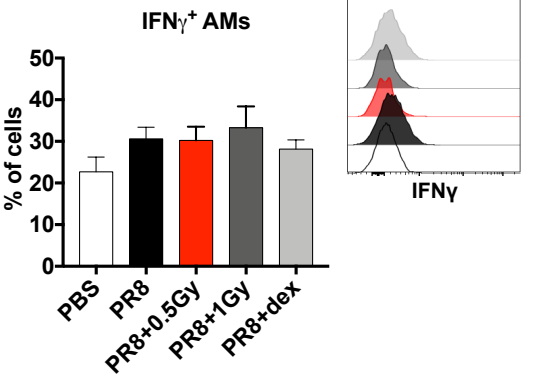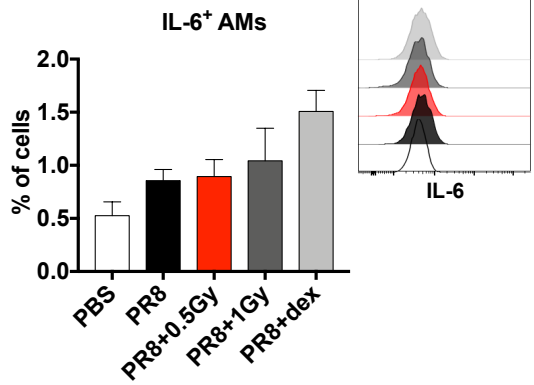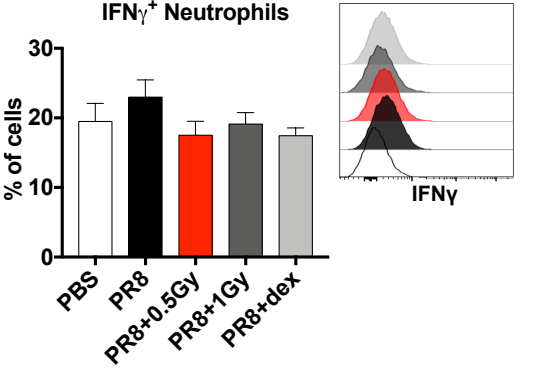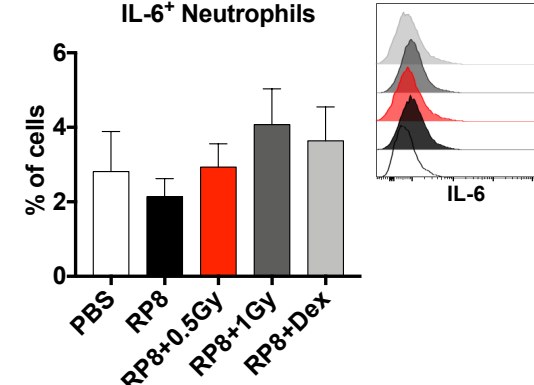

**Supplementary table 1**

|                      |                                   |      | p value |
|----------------------|-----------------------------------|------|---------|
| Fig 1A               | LPS vs. PBS                       | **** | 0,0001  |
|                      | LPS vs. LPS+0.5Gy                 | ns   | 0,1702  |
|                      | LPS vs. LPS+1Gy                   | *    | 0,0286  |
| Fig 1B               | LPS vs. PBS                       | **** | 0,0001  |
|                      | LPS vs. LPS+0.5Gy                 | ns   | 0,5149  |
|                      | LPS vs. LPS+1Gy                   | *    | 0,0198  |
| Fig 1C               | LPS vs. PBS                       | *    | 0,0284  |
|                      | LPS vs. LPS+0.5Gy                 | ns   | 0,0762  |
|                      | LPS vs. LPS+1Gy                   | ns   | 0,2516  |
| Fig 1D               | PBS vs. LPS                       | ns   | 0,1613  |
|                      | PBS vs. LPS+0.5Gy                 | *    | 0,0482  |
|                      | PBS vs. LPS+1Gy                   | *    | 0,0136  |
|                      | LPS vs. LPS+0.5Gy                 | ns   | 0,88    |
|                      | LPS vs. LPS+1Gy                   | ns   | 0,4588  |
| Fig 1E               | LPS+0.5Gy vs. LPS+1Gy             | ns   | 0,8605  |
|                      | PBS vs. Poly(I:C)                 | ns   | 0,1923  |
|                      | PBS vs. Poly(I:C)+0.5Gy           | **** | <0,0001 |
|                      | PBS vs. Poly(I:C)+1Gy             | **   | 0,0022  |
|                      | Poly(I:C) vs. Poly(I:C)+0.5Gy     | *    | 0,0133  |
| Fig 2B               | Poly(I:C) vs. Poly(I:C)+1Gy       | ns   | 0,234   |
|                      | Poly(I:C)+0.5Gy vs. Poly(I:C)+1Gy | ns   | 0,5194  |
|                      | PR8 vs. PBS                       | ***  | 0,001   |
|                      | PR8 vs. PR8+dex                   | ns   | 0,4387  |
|                      | PR8 vs. PR8+0.5Gy                 | ns   | 0,1347  |
|                      | PR8 vs. PR8+1Gy                   | ns   | 0,4387  |
|                      | PR8+dex vs. PBS                   | *    | 0,0307  |
| Fig 2E (CD45+ cells) | PR8+dex vs. PR8                   | ns   | 0,4387  |
|                      | PR8+dex vs. PR8+0.5Gy             | ns   | 0,8876  |
|                      | PR8+dex vs. PR8+1Gy               | ns   | 0,9999  |
|                      | PR8 vs. PBS                       | ns   | 0,057   |
|                      | PR8 vs. PR8+dex                   | ns   | 0,1612  |
|                      | PR8 vs. PR8+0.5Gy                 | *    | 0,0455  |
|                      | PR8 vs. PR8+1Gy                   | ns   | 0,0924  |
| Fig 2E (Neutrophils) | PR8 vs. PBS                       | ***  | 0,001   |
|                      | PR8 vs. PR8+dex                   | ns   | 0,8045  |
|                      | PR8 vs. PR8+0.5Gy                 | ns   | 0,1974  |
| Fig 2E (AMs)         | PR8 vs. PR8+1Gy                   | ns   | 0,4993  |
|                      | PR8 vs. PBS                       | ns   | 0,7363  |
|                      | PR8 vs. PR8+dex                   | ns   | 0,7462  |
|                      | PR8 vs. PR8+0.5Gy                 | ns   | 0,764   |
| Fig 2E (NAMs)        | PR8 vs. PR8+1Gy                   | ns   | 0,7867  |
|                      | PR8 vs. PBS                       | ***  | 0,0006  |
|                      | PR8 vs. PR8+dex                   | ns   | 0,9841  |
|                      | PR8 vs. PR8+0.5Gy                 | ns   | 0,4993  |
| Fig 2E (IMs)         | PR8 vs. PR8+1Gy                   | ns   | 0,9997  |
|                      | PR8 vs. PBS                       | **   | 0,0032  |
|                      | PR8 vs. PR8+dex                   | *    | 0,0482  |
|                      | PR8 vs. PR8+0.5Gy                 | ns   | 0,2823  |
| Fig 3A               | PR8 vs. PR8+1Gy                   | ns   | 0,0742  |
|                      | PR8 vs. PBS                       | ns   | 0,9239  |
|                      | PR8 vs. PR8+dex                   | ns   | 0,9924  |
|                      | PR8 vs. PR8+0.5Gy                 | *    | 0,0101  |
|                      | PR8 vs. PR8+1Gy                   | ns   | 0,1744  |
|                      | PR8+dex vs. PBS                   | ns   | 0,7674  |
|                      | PR8+dex vs. PR8                   | ns   | 0,9924  |
| Fig 3B               | PR8+dex vs. PR8+0.5Gy             | *    | 0,0306  |
|                      | PR8+dex vs. PR8+1Gy               | ns   | 0,3506  |
|                      | PR8 vs. PBS                       | ns   | 0,8548  |
|                      | PR8 vs. PR8+dex                   | ns   | 0,9992  |
|                      | PR8 vs. PR8+0.5Gy                 | ns   | 0,325   |
|                      | PR8 vs. PR8+1Gy                   | ns   | 0,124   |
|                      | PR8+dex vs. PBS                   | ns   | 0,7777  |
| Fig 3C               | PR8+dex vs. PR8                   | ns   | 0,9992  |
|                      | PR8+dex vs. PR8+0.5Gy             | ns   | 0,4627  |
|                      | PR8+dex vs. PR8+1Gy               | ns   | 0,2033  |
|                      | PR8 vs. PBS                       | ns   | 0,8176  |
|                      | PR8 vs. PR8+dex                   | ns   | 0,7712  |
|                      | PR8 vs. PR8+0.5Gy                 | *    | 0,0291  |
|                      | PR8 vs. PR8+1Gy                   | **   | 0,0068  |
| Fig 5B               | PR8+dex vs. PBS                   | ns   | 0,2806  |
|                      | PR8+dex vs. PR8                   | ns   | 0,7712  |
|                      | PR8+dex vs. PR8+0.5Gy             | ns   | 0,236   |
|                      | PR8+dex vs. PR8+1Gy               | ns   | 0,077   |
|                      | PR8 vs. PBS                       | ***  | 0,001   |
|                      | PR8 vs. PR8+Dex                   | ns   | 0,7197  |
| Fig 5B               | PR8 vs. PR8+0.5Gy                 | ns   | 0,6308  |
|                      | PR8 vs. PR8+1Gy                   | ns   | 0,6947  |
